# Supplementary material for: Eco-friendly synthesis of chromeno[4,3-b]chromenes with a new photosensitized WO3/ZnO@NH2-EY nanocatalyst
Source: Royal Society of Chemistry journal article supplement (doi:10.1039/d0ra09737c), 2021-01-01
Supplement: d0ra09737c1.pdf [file d0ra09737c1.pdf]

## Supporting Information

### Eco-friendly synthesis of chromeno[4, 3-b]chromenes with a new photosensitized WO<sub>3</sub>/ZnO@NH<sub>2</sub>-EY nanocatalyst

Zahra Jalili, Reza Tayebee\*, Farrokhzad M. Zonoz

Department of Chemistry, School of Sciences, Hakim Sabzevari University, Sabzevar, 96179-76487, Iran

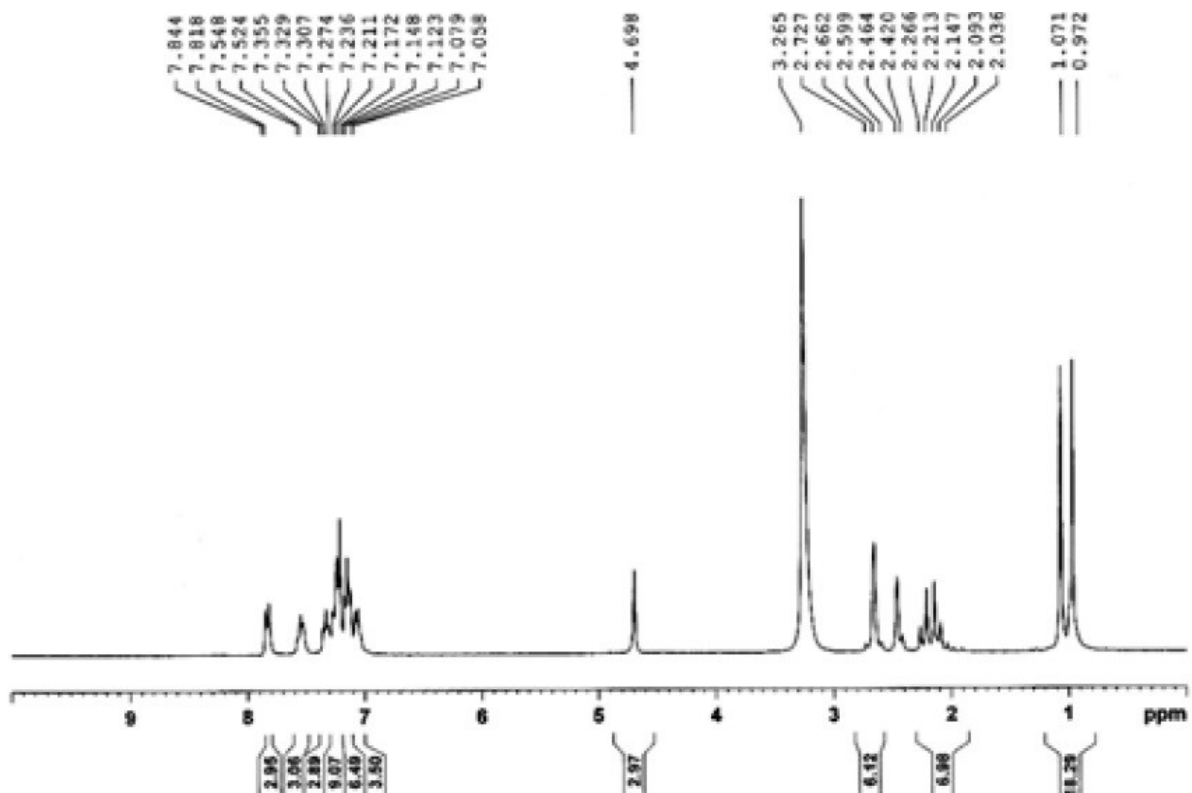

Fig. 1. <sup>1</sup>H NMR: 10,10-dimethyl-7-phenyl-10,11-dihydrochromeno[4,3-b]chromene-6,8(7H,9H)-dione (Table 4, entry 1)

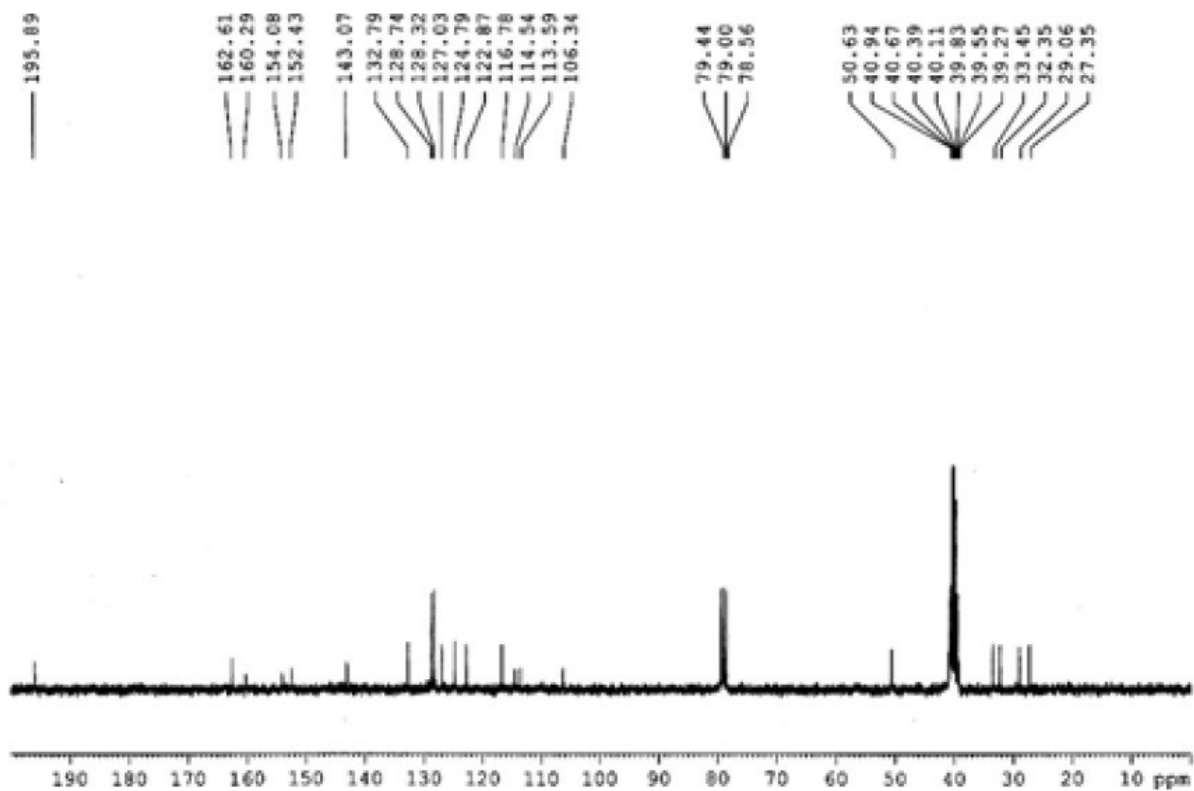

Fig. 2.  $^{13}\text{C}$  NMR: 10,10-dimethyl-7-phenyl-10,11-dihydrochromeno[4,3-b]chromene-6,8(7H,9H)-dione (Table 4, entry 1)

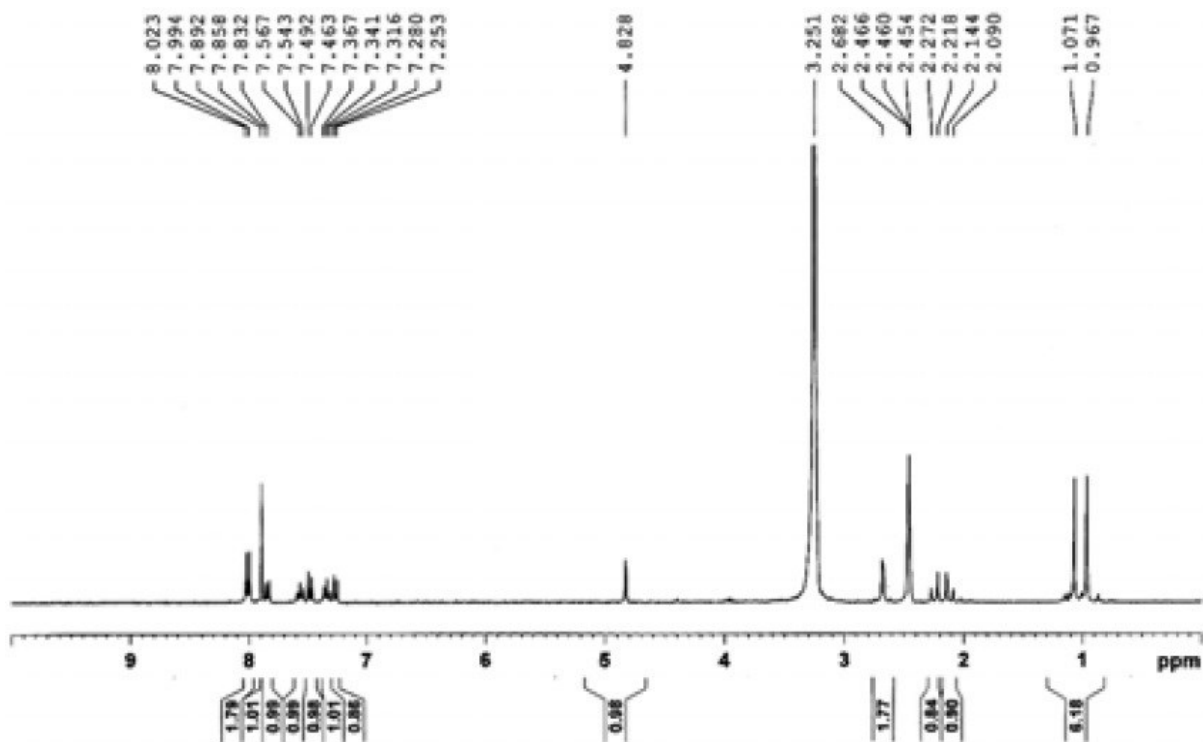

Fig. 3.  $^1\text{H}$  NMR: 10,10-Dimethyl-7-(4-nitrophenyl)-10,11-dihydrochromeno[4,3-b]chromene-6,8(7H,9H)-dione (Table 4, entry 2)

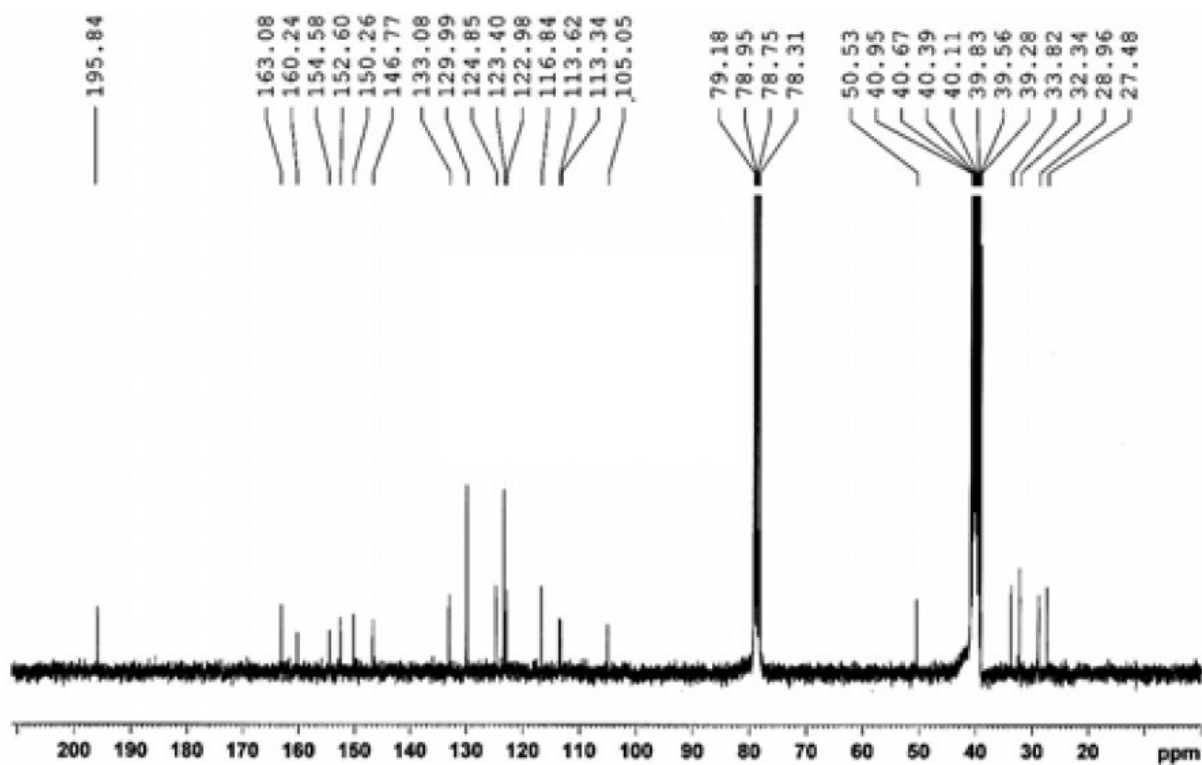

Fig. 4.  $^{13}\text{C}$  NMR: 10,10-Dimethyl-7-(4-nitrophenyl)-10,11-dihydrochromeno[4,3-b] chromene-6,8(7H,9H)-dione (Table 4, entry 2)

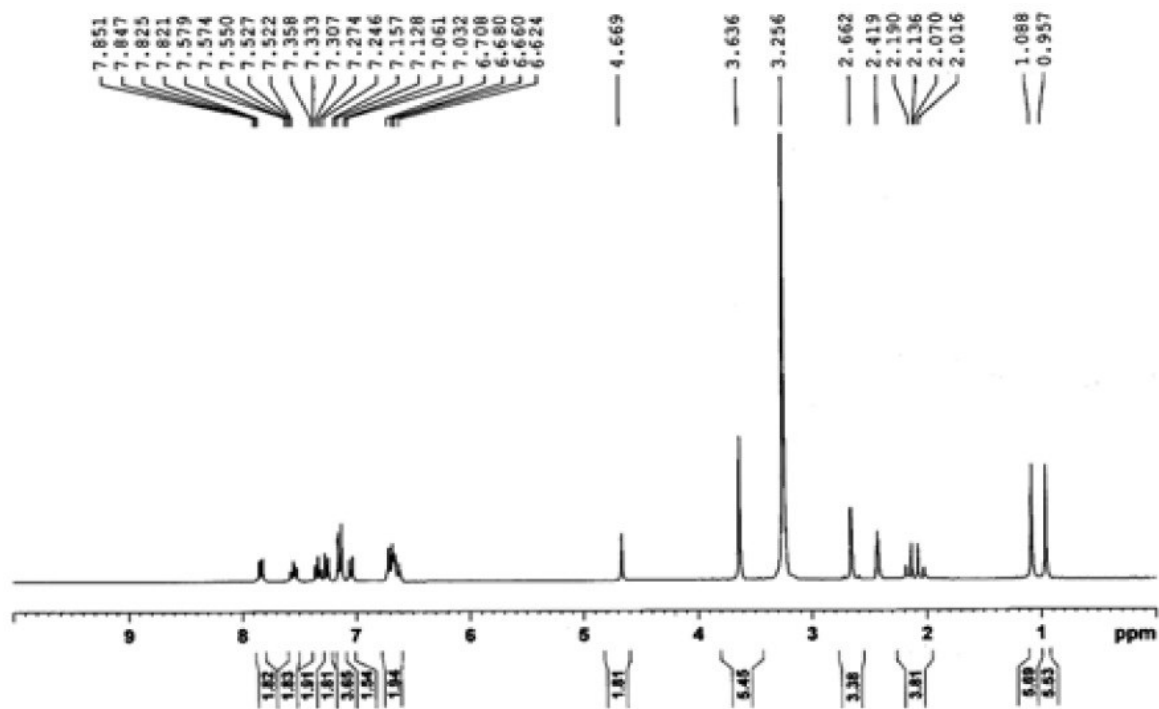

Fig. 5.  $^1\text{H}$  NMR: 10,10-Dimethyl-7-(4-methoxyphenyl)-10,11-dihydrochromeno[4,3-b] chromene-6,8(7H,9H)-dione (Table 4, entry 4)

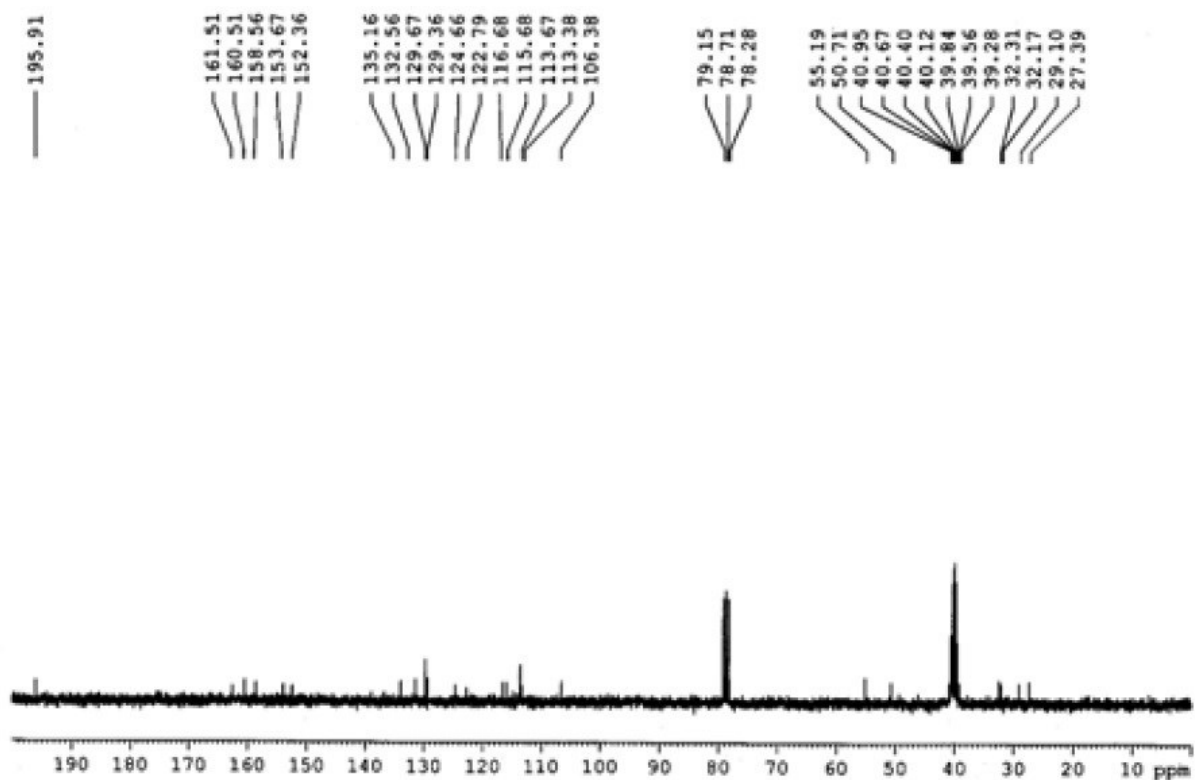

Fig. 6.  $^{13}\text{C}$  NMR: 10,10-Dimethyl-7-(4-methoxyphenyl)-10,11-dihydrochromeno[4,3-b] chromene-6,8(7H,9H)-dione (Table 4, entry 4)

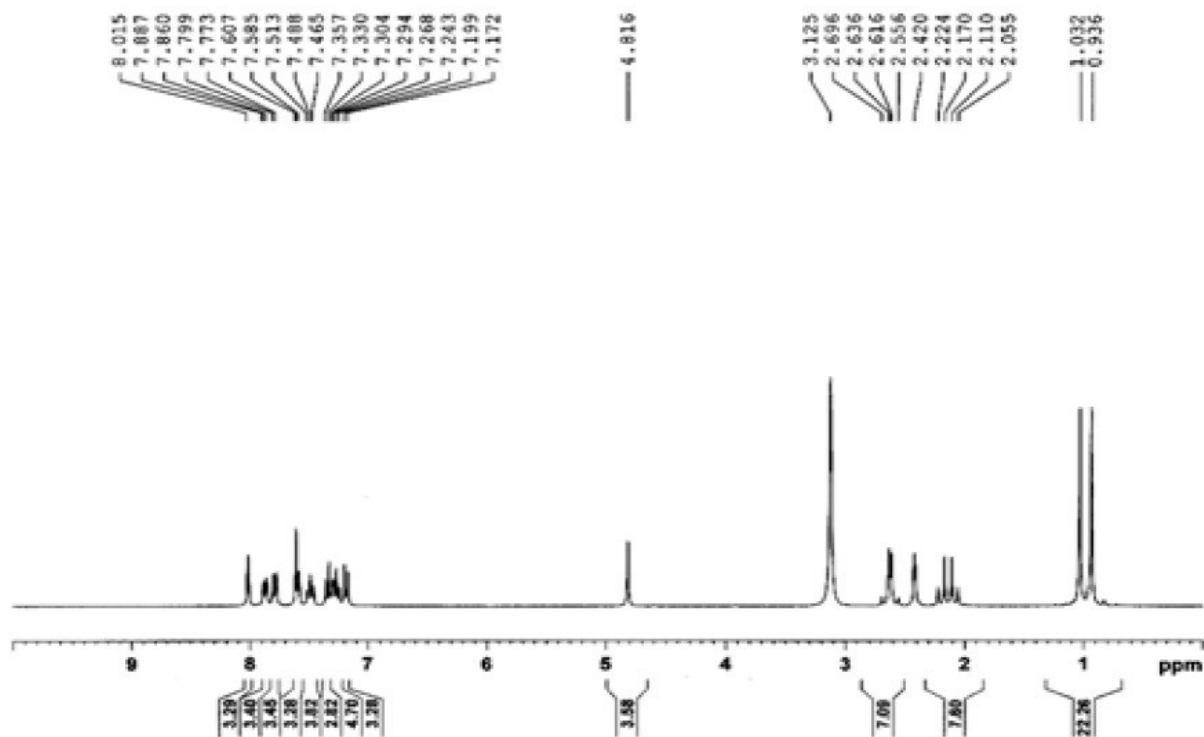

Fig. 7.  $^1\text{H}$  NMR: 10,10-Dimethyl-7-(3-nitrophenyl)-10,11-dihydrochromeno[4,3-b] chromene-6,8(7H,9H)-dione (Table 4, entry 5)

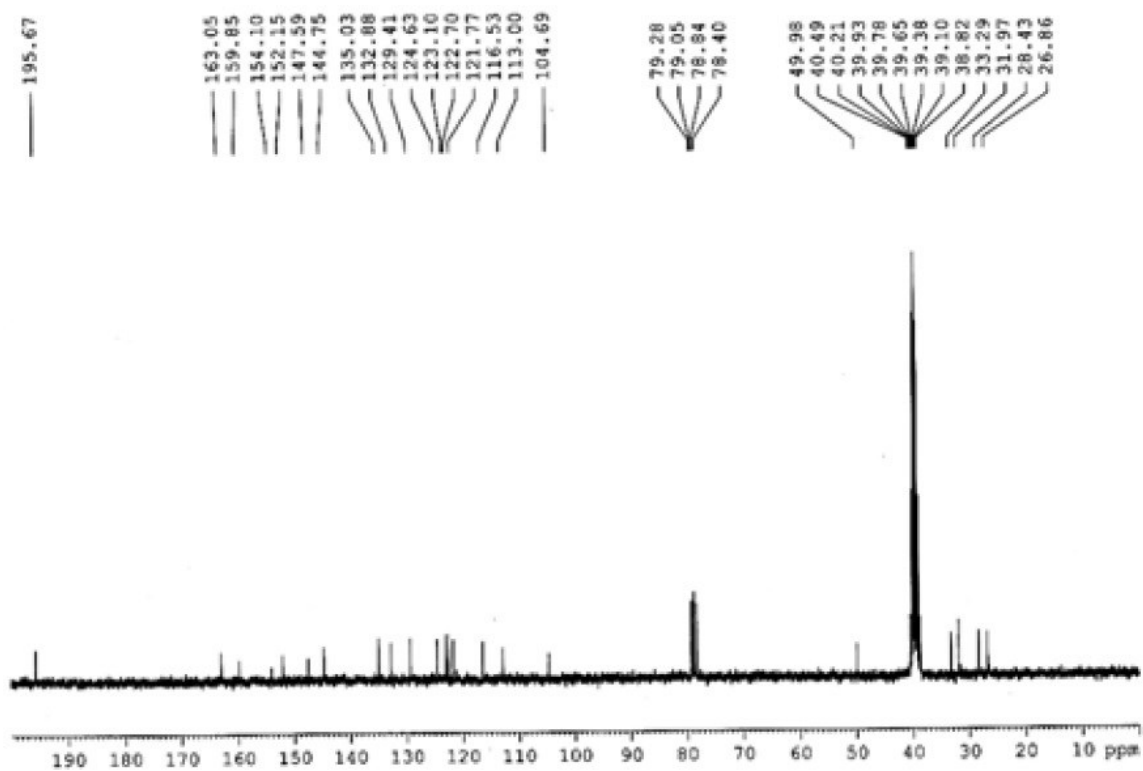

Fig. 8.  $^{13}\text{C}$ NMR: 10,10-Dimethyl-7-(3-nitrophenyl)-10,11-dihydrochromeno[4,3-b]chromene-6,8(7H,9H)-dione (Table 4, entry 5)

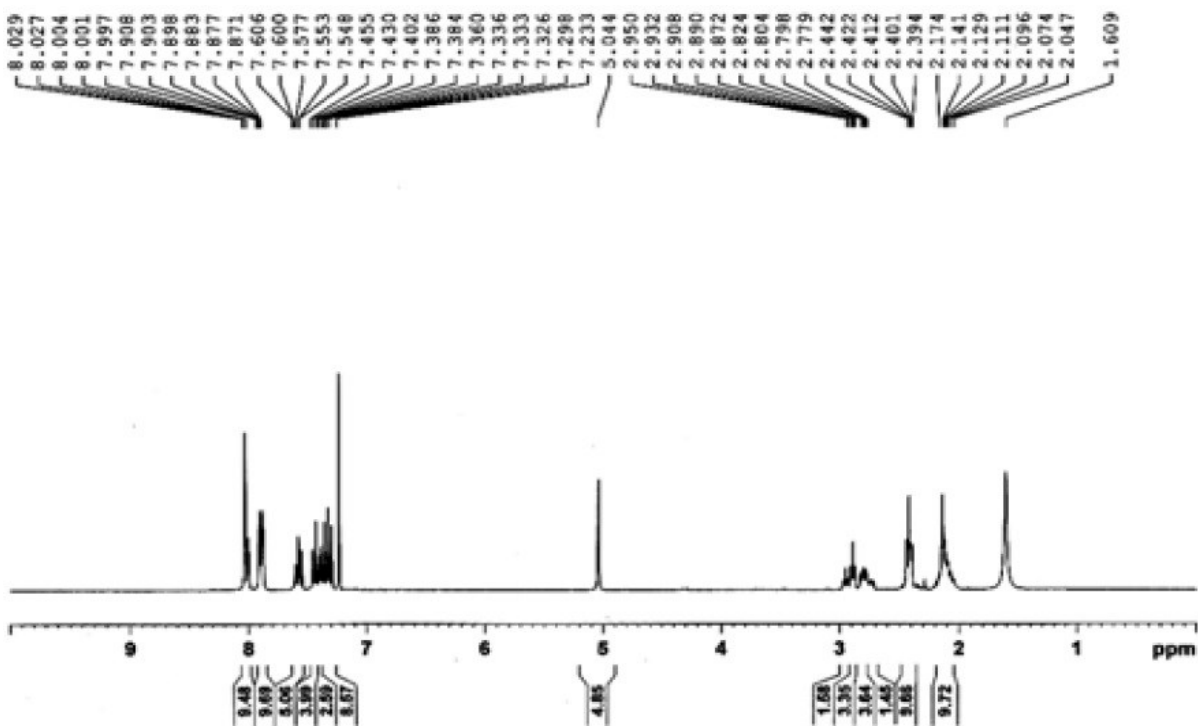

Fig. 9.  $^1\text{H}$ NMR: 7-(3-nitrophenyl)-10,11-dihydrochromeno[4,3-b]chromene-6,8(7H,9H)-dione (Table 4, entry 6)

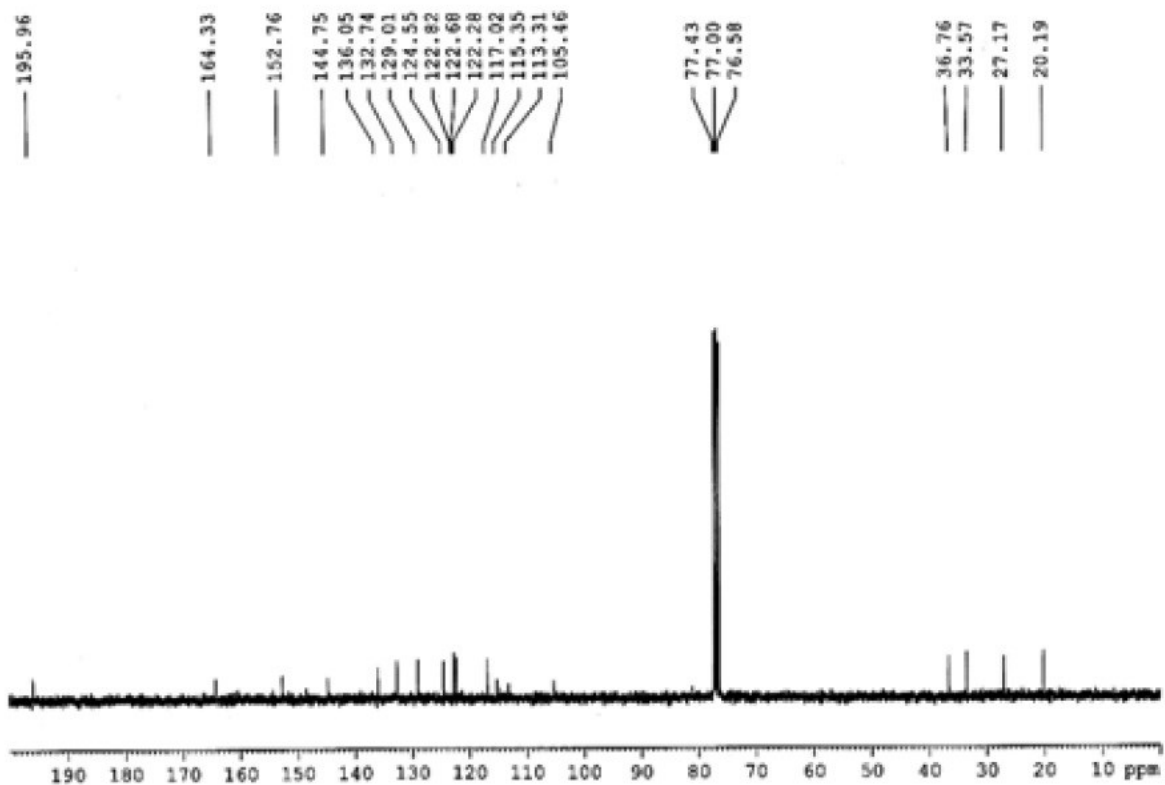

Fig. 10.  $^{13}\text{C}$ NMR: 7-(3-nitrophenyl)-10,11-dihydrochromeno[4,3-b]chromene-6,8(7H,9H)-dione (Table 4, entry 6)

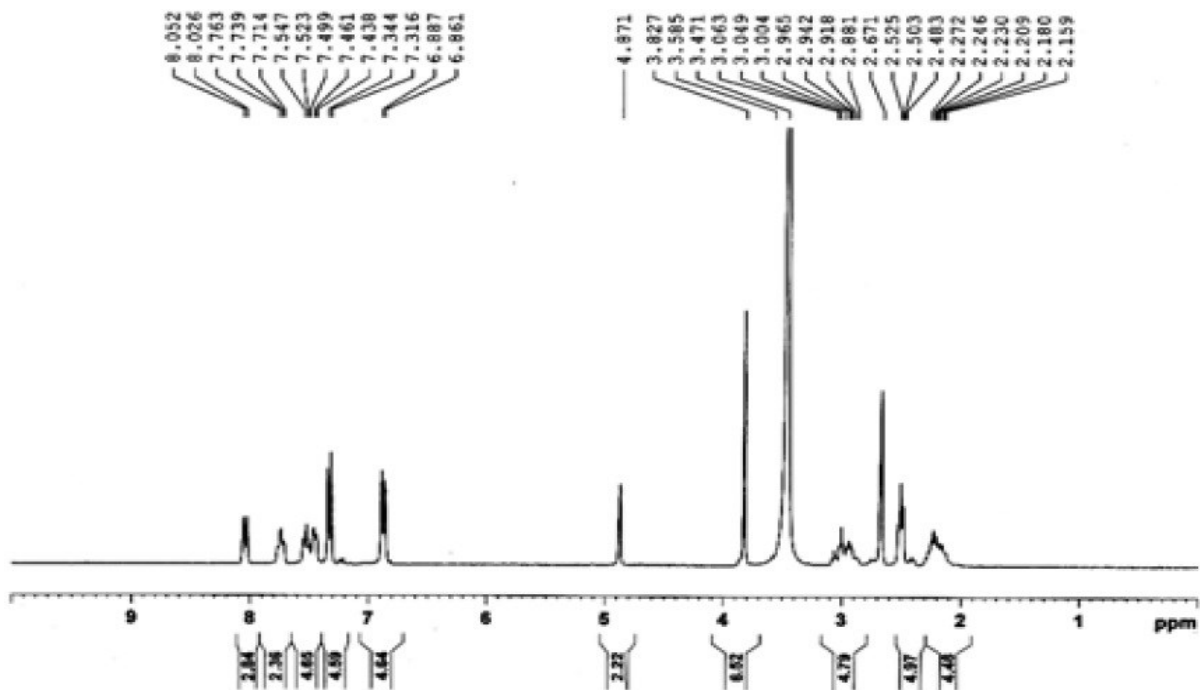

Fig. 11.  $^1\text{H}$ NMR: 7-(4-methoxyphenyl)-10,11-dihydrochromeno[4,3-b]chromene-6,8(7H,9H)-dione (Table 4, entry 7)

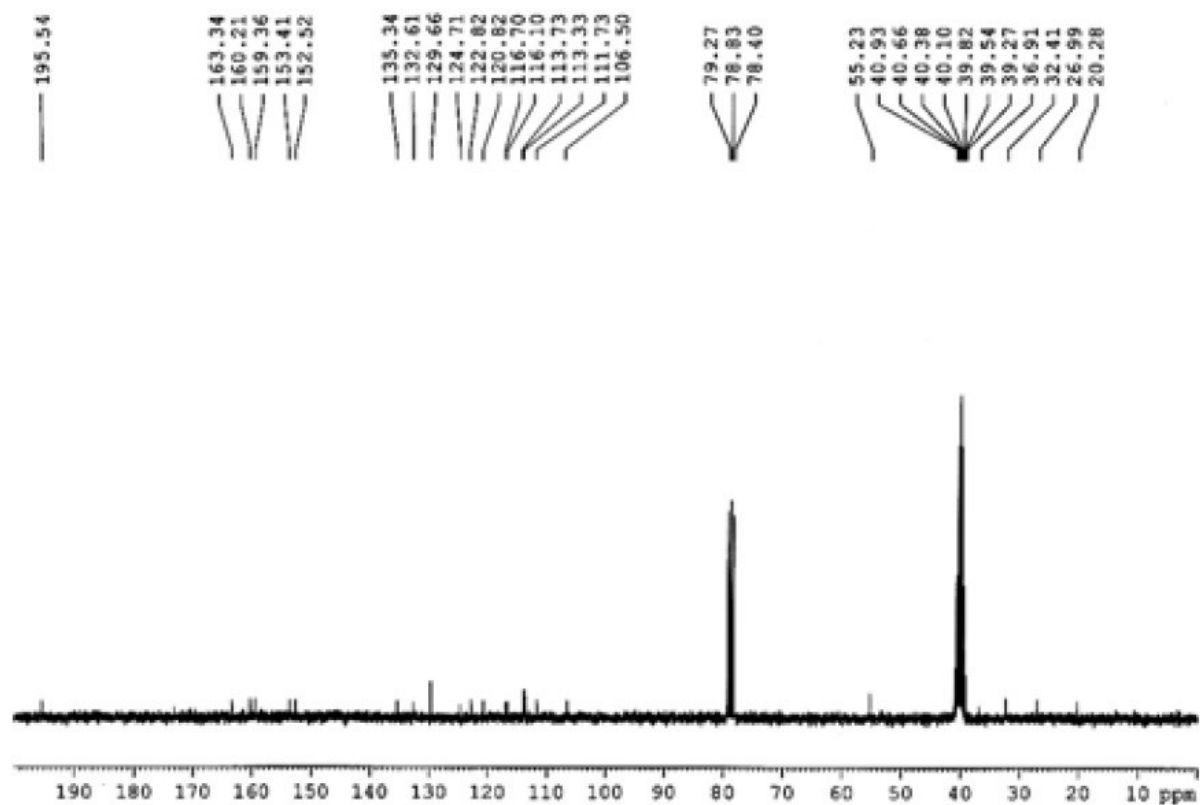

Fig. 12.  $^{13}\text{C}$ NMR: 7-(4-methoxyphenyl)-10,11-dihydrochromeno[4,3-b]chromene-6,8(7H,9H)-dione (Table 4, entry 7)
